# Supplementary material for: New submodel for emissions from Explosive Volcanic ERuptions (EVER v1.1) within the Modular Earth Submodel System (MESSy, version 2.55.1)
Source: Copernicus journal article supplement (doi:10.5194/gmd-18-3985-2025), 2025-07-02
Supplement: Supplementary file 1 [file gmd-18-3985-2025-supplement.zip]

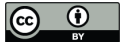

## *Supplement of*

# **New submodel for emissions from Explosive Volcanic ERuptions (EVER v1.1) within the Modular Earth Submodel System (MESSy, version 2.55.1)**

**Matthias Kohl et al.**

*Correspondence to:* Matthias Kohl (m.kohl@mpic.de)

- gmd-18-3985-2025-supplement-title-page.pdf
- EVER\_supplement
  - README
  - ever\_example.nml
  - ever\_historic\_stratVolcanoes.nml
  - meccanism\_Kilauea.pdf
  - meccanism\_strat.pdf
  - nml\_Kilauea
    - \* ECHAM5302\_L31ECMWF.nml
    - \* aéropt.nml
    - \* channel.nml
    - \* cloud.nml
    - \* cloudopt.nml
    - \* convect.nml
    - \* cvtrans.nml
    - \* ddep.nml
    - \* e5vdiff.nml
    - \* ever.nml
    - \* gmxe\_T106.nml
    - \* gmxe\_T255.nml
    - \* gmxe\_T63.nml
    - \* h2o.nml
    - \* import
    - \* import\_s201806.nml
    - \* jval.nml
    - \* lnox\_T106L31ECMWF.nml
    - \* lnox\_T255L31ECMWF.nml

- \* lnox\_T63L31ECMWF.nml
- \* mecca.nml
- \* offemis.nml
- \* onemis.nml
- \* orbit.nml
- \* qtimer.nml
- \* rad\_s2018.nml
- \* s4d.nml
- \* scav.nml
- \* sedi.nml
- \* sorbit.nml
- \* surface.nml
- \* switch.nml
- \* timer\_T106L31ECMWF.nml
- \* timer\_T255L31ECMWF.nml
- \* timer\_T63L31ECMWF.nml
- \* tracer\_s201806.nml
- \* tracers.txt
- \* tropop.nml
- nml\_strat
  - \* ECHAM5302\_L90MA.nml
  - \* aéropt.nml
  - \* airsea.nml
  - \* bioburn.nml
  - \* channel.nml
  - \* cloud.nml
  - \* cloudopt.nml
  - \* convect.nml
  - \* cvtrans.nml
  - \* ddep.nml
  - \* e5vdiff.nml
  - \* ever.nml
  - \* gmxe\_T63.nml
  - \* gwave.nml
  - \* h2o.nml
  - \* import
  - \* import\_s2008.nml
  - \* import\_s2011.nml
  - \* jval.nml
  - \* lnox\_T63L90MA.nml
  - \* mecca.nml
  - \* offemis.nml
  - \* onemis.nml
  - \* oracle.nml
  - \* orbit.nml
  - \* orogw.nml
  - \* qbo.nml

- \* qtimer.nml
- \* rad.nml
- \* scav.nml
- \* sedi.nml
- \* sorbit.nml
- \* surface.nml
- \* switch.nml
- \* tendency.nml
- \* timer\_T63L90MA.nml
- \* tnudge.nml
- \* tracer\_s2008.nml
- \* tracer\_s2011.nml
- \* tropop.nml
- xmessy\_mmd.Kilauea\_T255
- xmessy\_mmd.stratVolc

The copyright of individual parts of the supplement might differ from the article licence.
