# Supplementary material for: New submodel for emissions from Explosive Volcanic ERuptions (EVER v1.1) within the Modular Earth Submodel System (MESSy, version 2.55.1)
Source: Copernicus journal article supplement (doi:10.5194/gmd-18-3985-2025), 2025-07-02
Supplement: Supplementary file 3 [file gmd-18-3985-2025-supplement.zip]

# The Chemical Mechanism of MECCA

KPP version: 2.2.3\_rs3

MECCA version: 4.4.0.m1

Date: June 10, 2024

Batch file: simple.bat

Integrator: rosenbrock\_posdef

Gas equation file: gas.eqn

Replacement file:

Selected reactions:

“Tr && G && !C && !Cl && !Br && !I && !Hg”

Number of aerosol phases: 0

Number of species in selected mechanism:

Gas phase: 54

Aqueous phase: 0

All species: 54

Number of reactions in selected mechanism:

Gas phase (Gnn): 116

Aqueous phase (Annn): 0

Henry (Hnnn): 0

Photolysis (Jnnn): 21

Aqueous phase photolysis (PHnnn): 0

Heterogeneous (HETnnn): 0

Equilibria (EQnn): 0

Isotope exchange (IEXnnn): 0

Tagging equations (TAGnnn): 0

Dummy (Dnn): 0

All equations: 137

Table 1: Gas phase reactions

| #     | labels   | reaction                                                                          | rate coefficient                                                                                                                       | reference                 |
|-------|----------|-----------------------------------------------------------------------------------|----------------------------------------------------------------------------------------------------------------------------------------|---------------------------|
| G1000 | UpStTrG  | $\text{O}_2 + \text{O}(^1\text{D}) \rightarrow \text{O}(^3\text{P}) + \text{O}_2$ | $3.3\text{E}-11 \cdot \text{EXP}(55./\text{temp})$                                                                                     | Burkholder et al. (2015)  |
| G1001 | UpStTrG  | $\text{O}_2 + \text{O}(^3\text{P}) \rightarrow \text{O}_3$                        | $6.0\text{E}-34 \cdot ((\text{temp}/300.)^{**}(-2.4))$<br>$\cdot \text{cair}$                                                          | Burkholder et al. (2015)  |
| G2100 | UpStTrG  | $\text{H} + \text{O}_2 \rightarrow \text{HO}_2$                                   | $\text{k\_3rd}(\text{temp}, \text{cair}, 4.4\text{E}-32, 1.3,$<br>$7.5\text{E}-11, -0.2, 0.6)$                                         | Burkholder et al. (2015)  |
| G2104 | UpStTrG  | $\text{OH} + \text{O}_3 \rightarrow \text{HO}_2 + \text{O}_2$                     | $1.7\text{E}-12 \cdot \text{EXP}(-940./\text{temp})$                                                                                   | Burkholder et al. (2015)  |
| G2105 | UpStTrG  | $\text{OH} + \text{H}_2 \rightarrow \text{H}_2\text{O} + \text{H}$                | $2.8\text{E}-12 \cdot \text{EXP}(-1800./\text{temp})$                                                                                  | Burkholder et al. (2015)  |
| G2107 | UpStTrG  | $\text{HO}_2 + \text{O}_3 \rightarrow \text{OH} + 2 \text{O}_2$                   | $1.\text{E}-14 \cdot \text{EXP}(-490./\text{temp})$                                                                                    | Burkholder et al. (2015)  |
| G2109 | UpStTrG  | $\text{HO}_2 + \text{OH} \rightarrow \text{H}_2\text{O} + \text{O}_2$             | $4.8\text{E}-11 \cdot \text{EXP}(250./\text{temp})$                                                                                    | Burkholder et al. (2015)  |
| G2110 | UpStTrG  | $\text{HO}_2 + \text{HO}_2 \rightarrow \text{H}_2\text{O}_2 + \text{O}_2$         | $\text{k\_H02\_H02}$                                                                                                                   | Burkholder et al. (2015)* |
| G2111 | UpStTrG  | $\text{H}_2\text{O} + \text{O}(^1\text{D}) \rightarrow 2 \text{OH}$               | $1.63\text{E}-10 \cdot \text{EXP}(60./\text{temp})$                                                                                    | Burkholder et al. (2015)  |
| G2112 | UpStTrG  | $\text{H}_2\text{O}_2 + \text{OH} \rightarrow \text{H}_2\text{O} + \text{HO}_2$   | $1.8\text{E}-12$                                                                                                                       | Burkholder et al. (2015)  |
| G2117 | UpStTrG  | $\text{H}_2\text{O} + \text{H}_2\text{O} \rightarrow (\text{H}_2\text{O})_2$      | $6.521\text{E}-26 \cdot \text{temp} \cdot \text{EXP}(1851.09/\text{temp})$<br>$\cdot \text{EXP}(-5.10485\text{E}-3 \cdot \text{temp})$ | Scribano et al. (2006)*   |
| G2118 | UpStTrG  | $(\text{H}_2\text{O})_2 \rightarrow \text{H}_2\text{O} + \text{H}_2\text{O}$      | $1.\text{E}0$                                                                                                                          | see note*                 |
| G3101 | UpStTrGN | $\text{N}_2 + \text{O}(^1\text{D}) \rightarrow \text{O}(^3\text{P}) + \text{N}_2$ | $2.15\text{E}-11 \cdot \text{EXP}(110./\text{temp})$                                                                                   | Burkholder et al. (2015)  |
| G3103 | UpStTrGN | $\text{NO} + \text{O}_3 \rightarrow \text{NO}_2 + \text{O}_2$                     | $3.0\text{E}-12 \cdot \text{EXP}(-1500./\text{temp})$                                                                                  | Burkholder et al. (2015)  |
| G3106 | StTrGN   | $\text{NO}_2 + \text{O}_3 \rightarrow \text{NO}_3 + \text{O}_2$                   | $1.2\text{E}-13 \cdot \text{EXP}(-2450./\text{temp})$                                                                                  | Burkholder et al. (2015)  |
| G3108 | StTrGN   | $\text{NO}_3 + \text{NO} \rightarrow 2 \text{NO}_2$                               | $1.5\text{E}-11 \cdot \text{EXP}(170./\text{temp})$                                                                                    | Burkholder et al. (2015)  |
| G3109 | UpStTrGN | $\text{NO}_3 + \text{NO}_2 \rightarrow \text{N}_2\text{O}_5$                      | $\text{k\_N03\_N02}$                                                                                                                   | Burkholder et al. (2015)* |
| G3110 | StTrGN   | $\text{N}_2\text{O}_5 \rightarrow \text{NO}_2 + \text{NO}_3$                      | $\text{k\_N03\_N02}/(5.8\text{E}-27 \cdot \text{EXP}(10840./$<br>$\text{temp}))$                                                       | Burkholder et al. (2015)* |
| G3200 | TrGN     | $\text{NO} + \text{OH} \rightarrow \text{HONO}$                                   | $\text{k\_3rd}(\text{temp}, \text{cair}, 7.0\text{E}-31, 2.6,$<br>$3.6\text{E}-11, 0.1, 0.6)$                                          | Burkholder et al. (2015)  |
| G3201 | UpStTrGN | $\text{NO} + \text{HO}_2 \rightarrow \text{NO}_2 + \text{OH}$                     | $3.3\text{E}-12 \cdot \text{EXP}(270./\text{temp})$                                                                                    | Burkholder et al. (2015)  |
| G3202 | UpStTrGN | $\text{NO}_2 + \text{OH} \rightarrow \text{HNO}_3$                                | $\text{k\_3rd}(\text{temp}, \text{cair}, 1.8\text{E}-30, 3.0,$<br>$2.8\text{E}-11, 0., 0.6)$                                           | Burkholder et al. (2015)  |
| G3203 | StTrGN   | $\text{NO}_2 + \text{HO}_2 \rightarrow \text{HNO}_4$                              | $\text{k\_N02\_H02}$                                                                                                                   | Burkholder et al. (2015)* |
| G3204 | TrGN     | $\text{NO}_3 + \text{HO}_2 \rightarrow \text{NO}_2 + \text{OH} + \text{O}_2$      | $3.5\text{E}-12$                                                                                                                       | Burkholder et al. (2015)  |
| G3205 | TrGN     | $\text{HONO} + \text{OH} \rightarrow \text{NO}_2 + \text{H}_2\text{O}$            | $1.8\text{E}-11 \cdot \text{EXP}(-390./\text{temp})$                                                                                   | Burkholder et al. (2015)  |
| G3206 | StTrGN   | $\text{HNO}_3 + \text{OH} \rightarrow \text{H}_2\text{O} + \text{NO}_3$           | $\text{k\_HNO3\_OH}$                                                                                                                   | Dulitz et al. (2018)*     |
| G3207 | StTrGN   | $\text{HNO}_4 \rightarrow \text{NO}_2 + \text{HO}_2$                              | $\text{k\_N02\_H02}/(2.1\text{E}-27 \cdot \text{EXP}(10900./$<br>$\text{temp}))$                                                       | Burkholder et al. (2015)* |
| G3208 | StTrGN   | $\text{HNO}_4 + \text{OH} \rightarrow \text{NO}_2 + \text{H}_2\text{O}$           | $1.3\text{E}-12 \cdot \text{EXP}(380./\text{temp})$                                                                                    | Burkholder et al. (2015)  |

Table 1: Gas phase reactions (... continued)

| #      | labels | reaction                                                                                                                           | rate coefficient                                                                                       | reference                                                                      |
|--------|--------|------------------------------------------------------------------------------------------------------------------------------------|--------------------------------------------------------------------------------------------------------|--------------------------------------------------------------------------------|
| G3209  | TrGN   | $\text{NH}_3 + \text{OH} \rightarrow \text{NH}_2 + \text{H}_2\text{O}$                                                             | $1.7\text{E}-12 \cdot \text{EXP}(-710./\text{temp})$                                                   | Kohlmann and Poppe (1999)                                                      |
| G3210  | TrGN   | $\text{NH}_2 + \text{O}_3 \rightarrow \text{NH}_2\text{O} + \text{O}_2$                                                            | $4.3\text{E}-12 \cdot \text{EXP}(-930./\text{temp})$                                                   | Kohlmann and Poppe (1999)                                                      |
| G3211  | TrGN   | $\text{NH}_2 + \text{HO}_2 \rightarrow \text{NH}_2\text{O} + \text{OH}$                                                            | $4.8\text{E}-07 \cdot \text{EXP}(-628./\text{temp}) \cdot (\text{temp})^{**(-1.32)}$                   | Kohlmann and Poppe (1999)                                                      |
| G3212  | TrGN   | $\text{NH}_2 + \text{HO}_2 \rightarrow \text{HNO} + \text{H}_2\text{O}$                                                            | $9.4\text{E}-09 \cdot \text{EXP}(-356./\text{temp}) \cdot (\text{temp})^{**(-1.12)}$                   | Kohlmann and Poppe (1999)                                                      |
| G3213  | TrGN   | $\text{NH}_2 + \text{NO} \rightarrow \text{HO}_2 + \text{OH} + \text{N}_2$                                                         | $1.92\text{E}-12 \cdot ((\text{temp}/298.)^{**(-1.5)})$                                                | Kohlmann and Poppe (1999)                                                      |
| G3214  | TrGN   | $\text{NH}_2 + \text{NO} \rightarrow \text{N}_2 + \text{H}_2\text{O}$                                                              | $1.41\text{E}-11 \cdot ((\text{temp}/298.)^{**(-1.5)})$                                                | Kohlmann and Poppe (1999)                                                      |
| G3215  | TrGN   | $\text{NH}_2 + \text{NO}_2 \rightarrow \text{N}_2\text{O} + \text{H}_2\text{O}$                                                    | $1.2\text{E}-11 \cdot ((\text{temp}/298.)^{**(-2.0)})$                                                 | Kohlmann and Poppe (1999)                                                      |
| G3216  | TrGN   | $\text{NH}_2 + \text{NO}_2 \rightarrow \text{NH}_2\text{O} + \text{NO}$                                                            | $0.8\text{E}-11 \cdot ((\text{temp}/298.)^{**(-2.0)})$                                                 | Kohlmann and Poppe (1999)                                                      |
| G3217  | TrGN   | $\text{NH}_2\text{O} + \text{O}_3 \rightarrow \text{NH}_2 + \text{O}_2$                                                            | $1.2\text{E}-14$                                                                                       | Kohlmann and Poppe (1999)                                                      |
| G3218  | TrGN   | $\text{NH}_2\text{O} \rightarrow \text{NHOH}$                                                                                      | $1.3\text{E}3$                                                                                         | Kohlmann and Poppe (1999)                                                      |
| G3219  | TrGN   | $\text{HNO} + \text{OH} \rightarrow \text{NO} + \text{H}_2\text{O}$                                                                | $8.0\text{E}-11 \cdot \text{EXP}(-500./\text{temp})$                                                   | Kohlmann and Poppe (1999)                                                      |
| G3220  | TrGN   | $\text{HNO} + \text{NHOH} \rightarrow \text{NH}_2\text{OH} + \text{NO}$                                                            | $1.66\text{E}-12 \cdot \text{EXP}(-1500./\text{temp})$                                                 | Kohlmann and Poppe (1999)                                                      |
| G3221  | TrGN   | $\text{HNO} + \text{NO}_2 \rightarrow \text{HONO} + \text{NO}$                                                                     | $1.0\text{E}-12 \cdot \text{EXP}(-1000./\text{temp})$                                                  | Kohlmann and Poppe (1999)                                                      |
| G3222  | TrGN   | $\text{NHOH} + \text{OH} \rightarrow \text{HNO} + \text{H}_2\text{O}$                                                              | $1.66\text{E}-12$                                                                                      | Kohlmann and Poppe (1999)                                                      |
| G3223  | TrGN   | $\text{NH}_2\text{OH} + \text{OH} \rightarrow \text{NHOH} + \text{H}_2\text{O}$                                                    | $4.13\text{E}-11 \cdot \text{EXP}(-2138./\text{temp})$                                                 | Kohlmann and Poppe (1999)                                                      |
| G3224  | TrGN   | $\text{HNO} + \text{O}_2 \rightarrow \text{HO}_2 + \text{NO}$                                                                      | $3.65\text{E}-14 \cdot \text{EXP}(-4600./\text{temp})$                                                 | Kohlmann and Poppe (1999)                                                      |
| G4101  | StTrG  | $\text{CH}_4 + \text{OH} \rightarrow \text{CH}_3 + \text{H}_2\text{O}$                                                             | $1.85\text{E}-20 \cdot \text{EXP}(2.82 \cdot \text{LOG}(\text{temp}) - 987./\text{temp})$              | Atkinson (2003)                                                                |
| G4102  | TrG    | $\text{CH}_3\text{OH} + \text{OH} \rightarrow .85 \text{ HCHO} + .85 \text{ HO}_2 + .15 \text{ CH}_3\text{O} + \text{H}_2\text{O}$ | $6.38\text{E}-18 \cdot ((\text{temp})^{**2}) \cdot \text{EXP}(144./\text{temp})$                       | Atkinson et al. (2006)                                                         |
| G4103a | StTrG  | $\text{CH}_3\text{O}_2 + \text{HO}_2 \rightarrow \text{CH}_3\text{OOH} + \text{O}_2$                                               | $3.8\text{E}-13 \cdot \text{EXP}(780./\text{temp}) / (1.+1./498. \cdot \text{EXP}(1160./\text{temp}))$ | Atkinson et al. (2006)                                                         |
| G4103b | StTrG  | $\text{CH}_3\text{O}_2 + \text{HO}_2 \rightarrow \text{HCHO} + \text{H}_2\text{O} + \text{O}_2$                                    | $3.8\text{E}-13 \cdot \text{EXP}(780./\text{temp}) / (1.+498. \cdot \text{EXP}(-1160./\text{temp}))$   | Atkinson et al. (2006)                                                         |
| G4104a | StTrGN | $\text{CH}_3\text{O}_2 + \text{NO} \rightarrow \text{CH}_3\text{O} + \text{NO}_2$                                                  | $2.3\text{E}-12 \cdot \text{EXP}(360./\text{temp}) \cdot (1.-\text{beta\_CH3NO3})$                     | Atkinson et al. (2006),<br>Butkovskaya et al. (2012),<br>Flocke et al. (1998)  |
| G4104b | StTrGN | $\text{CH}_3\text{O}_2 + \text{NO} \rightarrow \text{CH}_3\text{ONO}_2$                                                            | $2.3\text{E}-12 \cdot \text{EXP}(360./\text{temp}) \cdot \text{beta\_CH3NO3}$                          | Atkinson et al. (2006),<br>Butkovskaya et al. (2012),<br>Flocke et al. (1998)* |
| G4105  | TrGN   | $\text{CH}_3\text{O}_2 + \text{NO}_3 \rightarrow \text{CH}_3\text{O} + \text{NO}_2 + \text{O}_2$                                   | $1.2\text{E}-12$                                                                                       | Atkinson et al. (2006)                                                         |
| G4106a | StTrG  | $\text{CH}_3\text{O}_2 \rightarrow \text{CH}_3\text{O} + .5 \text{ O}_2$                                                           | $7.4\text{E}-13 \cdot \text{EXP}(-520./\text{temp}) \cdot \text{R02} \cdot 2.$                         | Atkinson et al. (2006)                                                         |

Table 1: Gas phase reactions (... continued)

| #      | labels  | reaction                                                                                                                                                                      | rate coefficient                                                                                                                                             | reference                 |
|--------|---------|-------------------------------------------------------------------------------------------------------------------------------------------------------------------------------|--------------------------------------------------------------------------------------------------------------------------------------------------------------|---------------------------|
| G4106b | StTrG   | $\text{CH}_3\text{O}_2 \rightarrow .5 \text{HCHO} + .5 \text{CH}_3\text{OH} + .5 \text{O}_2$                                                                                  | $(\text{k\_CH302}-7.4\text{E}-13*\text{EXP}(-520./\text{temp}))$<br>$*\text{R02}*2.$                                                                         | Atkinson et al. (2006)    |
| G4107  | StTrG   | $\text{CH}_3\text{OOH} + \text{OH} \rightarrow .6 \text{CH}_3\text{O}_2 + .4 \text{HCHO} + .4 \text{OH} + \text{H}_2\text{O}$                                                 | $\text{k\_CH300H\_OH}$                                                                                                                                       | Wallington et al. (2018)  |
| G4108  | StTrG   | $\text{HCHO} + \text{OH} \rightarrow \text{CO} + \text{H}_2\text{O} + \text{HO}_2$                                                                                            | $9.52\text{E}-18*\text{EXP}(2.03*\text{LOG}(\text{temp})$<br>$+636./\text{temp})$                                                                            | Sivakumaran et al. (2003) |
| G4109  | TrGN    | $\text{HCHO} + \text{NO}_3 \rightarrow \text{HNO}_3 + \text{CO} + \text{HO}_2$                                                                                                | $3.4\text{E}-13*\text{EXP}(-1900./\text{temp})$                                                                                                              | Burkholder et al. (2015)* |
| G4110  | UpStTrG | $\text{CO} + \text{OH} \rightarrow \text{H} + \text{CO}_2$                                                                                                                    | $(1.57\text{E}-13+\text{cair}*3.54\text{E}-33)$                                                                                                              | McCabe et al. (2001)      |
| G4111  | TrG     | $\text{HCOOH} + \text{OH} \rightarrow \text{CO}_2 + \text{HO}_2 + \text{H}_2\text{O}$                                                                                         | $2.94\text{E}-14*\text{exp}(786./\text{temp})$<br>$+9.85\text{E}-13*\text{EXP}(-1036./\text{temp})$                                                          | Paulot et al. (2011)      |
| G4114  | StTrGN  | $\text{CH}_3\text{O}_2 + \text{NO}_2 \rightarrow \text{CH}_3\text{O}_2\text{NO}_2$                                                                                            | $\text{k\_NO2\_CH302}$                                                                                                                                       | Burkholder et al. (2015)  |
| G4115  | StTrGN  | $\text{CH}_3\text{O}_2\text{NO}_2 \rightarrow \text{CH}_3\text{O}_2 + \text{NO}_2$                                                                                            | $\text{k\_NO2\_CH302}/(9.5\text{E}-29*\text{EXP}(11234./$<br>$\text{temp}))$                                                                                 | Burkholder et al. (2015)* |
| G4116  | StTrGN  | $\text{CH}_3\text{O}_2\text{NO}_2 + \text{OH} \rightarrow \text{HCHO} + \text{NO}_3 + \text{H}_2\text{O}$                                                                     | $3.00\text{E}-14$                                                                                                                                            | see note*                 |
| G4117  | StTrGN  | $\text{CH}_3\text{ONO}_2 + \text{OH} \rightarrow \text{H}_2\text{O} + \text{HCHO} + \text{NO}_2$                                                                              | $4.0\text{E}-13*\text{EXP}(-845./\text{temp})$                                                                                                               | Atkinson et al. (2006)    |
| G4118  | StTrG   | $\text{CH}_3\text{O} \rightarrow \text{HO}_2 + \text{HCHO}$                                                                                                                   | $1.3\text{E}-14*\text{exp}(-663./\text{temp})*\text{c}(\text{ind\_02})$                                                                                      | Chai et al. (2014)        |
| G4119a | StTrGN  | $\text{CH}_3\text{O} + \text{NO}_2 \rightarrow \text{CH}_3\text{ONO}_2$                                                                                                       | $\text{k\_3rd\_iupac}(\text{temp}, \text{cair}, 8.1\text{E}-29,$<br>$4.5, 2.1\text{E}-11, 0., 0.44)$                                                         | Atkinson et al. (2006)    |
| G4119b | StTrGN  | $\text{CH}_3\text{O} + \text{NO}_2 \rightarrow \text{HCHO} + \text{HONO}$                                                                                                     | $9.6\text{E}-12*\text{EXP}(-1150./\text{temp})$                                                                                                              | Atkinson et al. (2006)    |
| G4120a | StTrGN  | $\text{CH}_3\text{O} + \text{NO} \rightarrow \text{CH}_3\text{ONO}$                                                                                                           | $\text{k\_3rd\_iupac}(\text{temp}, \text{cair}, 2.6\text{E}-29,$<br>$2.8, 3.3\text{E}-11, 0.6, \text{REAL}(\text{EXP}(-\text{temp}/$<br>$900.), \text{SP}))$ | Atkinson et al. (2006)    |
| G4120b | StTrGN  | $\text{CH}_3\text{O} + \text{NO} \rightarrow \text{HCHO} + \text{HNO}$                                                                                                        | $2.3\text{E}-12*(\text{temp}/300.)*\text{EXP}(0.7)$                                                                                                          | Atkinson et al. (2006)    |
| G4121  | StTrG   | $\text{CH}_3\text{O}_2 + \text{O}_3 \rightarrow \text{CH}_3\text{O} + 2 \text{O}_2$                                                                                           | $2.9\text{E}-16*\text{exp}(-1000./\text{temp})$                                                                                                              | Burkholder et al. (2015)  |
| G4122  | StTrGN  | $\text{CH}_3\text{ONO} + \text{OH} \rightarrow \text{H}_2\text{O} + \text{HCHO} + \text{NO}$                                                                                  | $1.\text{E}-10*\text{exp}(-1764./\text{temp})$                                                                                                               | Nielsen et al. (1991)     |
| G4123  | StTrG   | $\text{HCHO} + \text{HO}_2 \rightarrow \text{HOCH}_2\text{O}_2$                                                                                                               | $9.7\text{E}-15*\text{EXP}(625./\text{temp})$                                                                                                                | Atkinson et al. (2006)    |
| G4124  | StTrG   | $\text{HOCH}_2\text{O}_2 \rightarrow \text{HCHO} + \text{HO}_2$                                                                                                               | $2.4\text{E}12*\text{EXP}(-7000./\text{temp})$                                                                                                               | Atkinson et al. (2006)    |
| G4125  | StTrG   | $\text{HOCH}_2\text{O}_2 + \text{HO}_2 \rightarrow .5 \text{HOCH}_2\text{OOH} + .5 \text{HCOOH} + .2$<br>$\text{OH} + .2 \text{HO}_2 + .3 \text{H}_2\text{O} + .8 \text{O}_2$ | $5.6\text{E}-15*\text{EXP}(2300./\text{temp})$                                                                                                               | Atkinson et al. (2006)    |
| G4126  | StTrGN  | $\text{HOCH}_2\text{O}_2 + \text{NO} \rightarrow \text{NO}_2 + \text{HO}_2 + \text{HCOOH}$                                                                                    | $0.7275*2.3\text{E}-12*\text{EXP}(360./\text{temp})$                                                                                                         | Atkinson et al. (2006)*   |
| G4127  | StTrGN  | $\text{HOCH}_2\text{O}_2 + \text{NO}_3 \rightarrow \text{NO}_2 + \text{HO}_2 + \text{HCOOH}$                                                                                  | $1.2\text{E}-12$                                                                                                                                             | see note*                 |
| G4129a | StTrG   | $\text{HOCH}_2\text{O}_2 \rightarrow \text{HCOOH} + \text{HO}_2$                                                                                                              | $(\text{k\_CH302}*5.5\text{E}-12)*\text{EXP}(0.5)*\text{R02}*2.$                                                                                             | Atkinson et al. (2006)    |
| G4129b | StTrG   | $\text{HOCH}_2\text{O}_2 \rightarrow .5 \text{HCOOH} + .5 \text{HOCH}_2\text{OH} + .5 \text{O}_2$                                                                             | $(\text{k\_CH302}*5.7\text{E}-14*\text{EXP}(750./\text{temp}))$<br>$*\text{EXP}(0.5)*\text{R02}*2.$                                                          | Atkinson et al. (2006)    |
| G4130a | StTrG   | $\text{HOCH}_2\text{OOH} + \text{OH} \rightarrow \text{HOCH}_2\text{O}_2 + \text{H}_2\text{O}$                                                                                | $\text{k\_R00HRO}$                                                                                                                                           | Taraborrelli (2010)*      |
| G4130b | StTrG   | $\text{HOCH}_2\text{OOH} + \text{OH} \rightarrow \text{HCOOH} + \text{H}_2\text{O} + \text{OH}$                                                                               | $\text{k\_R0HRO} + \text{k\_sf\_s00H*sf\_sOH}$                                                                                                               | Taraborrelli (2010)*      |

Table 1: Gas phase reactions (... continued)

| #     | labels | reaction                                                                                                                                                 | rate coefficient                                                                                  | reference                                       |
|-------|--------|----------------------------------------------------------------------------------------------------------------------------------------------------------|---------------------------------------------------------------------------------------------------|-------------------------------------------------|
| G4132 | StTrG  | $\text{HOCH}_2\text{OH} + \text{OH} \rightarrow \text{HO}_2 + \text{HCOOH} + \text{H}_2\text{O}$                                                         | $2 \cdot k_{\text{ROHRO}} + k_{\text{s}} \cdot f_{\text{sOH}} \cdot f_{\text{sOH}}$               | Taraborrelli (2010)*                            |
| G4133 | StTrG  | $\text{CH}_3\text{O}_2 + \text{OH} \rightarrow \text{CH}_3\text{O} + \text{HO}_2$                                                                        | $1.4\text{E}-10$                                                                                  | Bossolasco et al. (2014)*                       |
| G4134 | StTrG  | $\text{CH}_2\text{OO} \rightarrow \text{CO} + \text{HO}_2 + \text{OH}$                                                                                   | $1.124\text{E}+14 \cdot \text{EXP}(-10000./\text{temp})$                                          | see note*                                       |
| G4135 | StTrG  | $\text{CH}_2\text{OO} + \text{H}_2\text{O} \rightarrow \text{HOCH}_2\text{OOH}$                                                                          | $k_{\text{CH200\_N02}} \cdot 3.6\text{E}-6$                                                       | Ouyang et al. (2013)*                           |
| G4136 | StTrG  | $\text{CH}_2\text{OO} + (\text{H}_2\text{O})_2 \rightarrow \text{HOCH}_2\text{OOH} + \text{H}_2\text{O}$                                                 | $5.2\text{E}-12$                                                                                  | Chao et al. (2015), Lewis et al. (2015)*        |
| G4137 | StTrGN | $\text{CH}_2\text{OO} + \text{NO} \rightarrow \text{HCHO} + \text{NO}_2$                                                                                 | $6.\text{E}-14$                                                                                   | Welz et al. (2012)*                             |
| G4138 | StTrGN | $\text{CH}_2\text{OO} + \text{NO}_2 \rightarrow \text{HCHO} + \text{NO}_3$                                                                               | $k_{\text{CH200\_N02}}$                                                                           | Welz et al. (2012), Stone et al. (2014)*        |
| G4140 | StTrG  | $\text{CH}_2\text{OO} + \text{CO} \rightarrow \text{HCHO} + \text{CO}_2$                                                                                 | $3.6\text{E}-14$                                                                                  | Vereecken et al. (2012)                         |
| G4141 | StTrG  | $\text{CH}_2\text{OO} + \text{HCOOH} \rightarrow 2 \text{HCOOH}$                                                                                         | $1.\text{E}-10$                                                                                   | Welz et al. (2014)*                             |
| G4142 | StTrG  | $\text{CH}_2\text{OO} + \text{HCHO} \rightarrow 2 \text{LCARBON}$                                                                                        | $1.7\text{E}-12$                                                                                  | Stone et al. (2014)*                            |
| G4143 | StTrG  | $\text{CH}_2\text{OO} + \text{CH}_3\text{OH} \rightarrow 2 \text{LCARBON}$                                                                               | $5.\text{E}-12$                                                                                   | Vereecken et al. (2012)*                        |
| G4144 | StTrG  | $\text{CH}_2\text{OO} + \text{CH}_3\text{O}_2 \rightarrow 2 \text{LCARBON}$                                                                              | $5.\text{E}-12$                                                                                   | Vereecken et al. (2012)*                        |
| G4145 | StTrG  | $\text{CH}_2\text{OO} + \text{HO}_2 \rightarrow \text{LCARBON}$                                                                                          | $5.\text{E}-12$                                                                                   | Vereecken et al. (2012)                         |
| G4146 | StTrG  | $\text{CH}_2\text{OO} + \text{O}_3 \rightarrow \text{HCHO} + 2 \text{O}_2$                                                                               | $1.\text{E}-12$                                                                                   | Vereecken et al. (2014)                         |
| G4147 | StTrG  | $\text{CH}_2\text{OO} + \text{CH}_2\text{OO} \rightarrow 2 \text{HCHO} + \text{O}_2$                                                                     | $6.\text{E}-11$                                                                                   | Buras et al. (2014)                             |
| G4148 | StTrGN | $\text{HOCH}_2\text{O}_2 + \text{NO}_2 \rightarrow \text{HOCH}_2\text{O}_2\text{NO}_2$                                                                   | $k_{\text{N02\_CH302}}$                                                                           | see note*                                       |
| G4149 | StTrGN | $\text{HOCH}_2\text{O}_2\text{NO}_2 \rightarrow \text{HOCH}_2\text{O}_2 + \text{NO}_2$                                                                   | $k_{\text{N02\_CH302}} / (9.5\text{E}-29 \cdot \text{EXP}(11234./\text{temp}))$                   | Barnes et al. (1985)*                           |
| G4150 | StTrGN | $\text{HOCH}_2\text{O}_2\text{NO}_2 + \text{OH} \rightarrow \text{HCOOH} + \text{NO}_3 + \text{H}_2\text{O}$                                             | $9.50\text{E}-13 \cdot \text{EXP}(-650./\text{temp}) \cdot f_{\text{sOH}}$                        | see note*                                       |
| G4151 | StTrG  | $\text{CH}_3 + \text{O}_2 \rightarrow \text{CH}_3\text{O}_2$                                                                                             | $k_{\text{3rd\_iupac}}(\text{temp}, \text{cair}, 7.0\text{E}-31, 3., 1.8\text{E}-12, -1.1, 0.33)$ | Atkinson et al. (2006)                          |
| G4152 | StTrG  | $\text{CH}_3 + \text{O}_3 \rightarrow .956 \text{HCHO} + .956 \text{H} + .044 \text{CH}_3\text{O} + \text{O}_2$                                          | $5.1\text{E}-12 \cdot \text{exp}(-210./\text{temp})$                                              | Albaladejo et al. (2002), Ogryzlo et al. (1981) |
| G4153 | StTrG  | $\text{CH}_3 + \text{O}(^3\text{P}) \rightarrow .83 \text{HCHO} + .83 \text{H} + .17 \text{CO} + .17 \text{H}_2 + .17 \text{H}$                          | $1.3\text{E}-10$                                                                                  | Atkinson et al. (2006)                          |
| G4154 | StTrG  | $\text{CH}_3\text{O} + \text{O}_3 \rightarrow \text{CH}_3\text{O}_2 + \text{O}_2$                                                                        | $2.53\text{E}-14$                                                                                 | Albaladejo et al. (2002)*                       |
| G4155 | StTrG  | $\text{CH}_3\text{O} + \text{O}(^3\text{P}) \rightarrow .75 \text{CH}_3 + .75 \text{O}_2 + .25 \text{HCHO} + .25 \text{OH}$                              | $2.5\text{E}-11$                                                                                  | Baulch et al. (2005)                            |
| G4156 | StTrG  | $\text{CH}_3\text{O}_2 + \text{O}(^3\text{P}) \rightarrow \text{CH}_3\text{O} + \text{O}_2$                                                              | $4.3\text{E}-11$                                                                                  | Zellner et al. (1988)                           |
| G4157 | StTrG  | $\text{HCHO} + \text{O}(^3\text{P}) \rightarrow .7 \text{OH} + .7 \text{CO} + .3 \text{H} + .3 \text{CO}_2 + \text{HO}_2$                                | $3.4\text{E}-11 \cdot \text{EXP}(-1600./\text{temp})$                                             | Burkholder et al. (2015)                        |
| G4158 | TrG    | $\text{CH}_2\text{OO}^* \rightarrow .37 \text{CH}_2\text{OO} + .47 \text{CO} + .47 \text{H}_2\text{O} + .16 \text{HO}_2 + .16 \text{CO} + .16 \text{OH}$ | KDEC                                                                                              | Atkinson et al. (2006)                          |

Table 1: Gas phase reactions (... continued)

| #      | labels | reaction                                                                             | rate coefficient                                                                                                                                    | reference                                |
|--------|--------|--------------------------------------------------------------------------------------|-----------------------------------------------------------------------------------------------------------------------------------------------------|------------------------------------------|
| G4159  | TrGN   | $\text{HCN} + \text{OH} \rightarrow \text{H}_2\text{O} + \text{CN}$                  | $\text{k\_3rd}(\text{temp}, \text{cair}, 4.28\text{E-}33, 1.0, \text{REAL}(4.25\text{E-}13 * \text{EXP}(-1150./\text{temp}), \text{SP}), 1.0, 0.8)$ | Kleinböhl et al. (2006)                  |
| G4160a | TrGN   | $\text{HCN} + \text{O}(^1\text{D}) \rightarrow \text{O}(^3\text{P}) + \text{HCN}$    | $1.08\text{E-}10 * \text{EXP}(105./\text{temp}) * 0.15 * \text{EXP}(200./\text{temp})$                                                              | Strekowski et al. (2010)                 |
| G4160b | TrGN   | $\text{HCN} + \text{O}(^1\text{D}) \rightarrow \text{H} + \text{NCO}$                | $1.08\text{E-}10 * \text{EXP}(105./\text{temp}) * 0.68/2.$                                                                                          | Strekowski et al. (2010)*                |
| G4160c | TrGN   | $\text{HCN} + \text{O}(^1\text{D}) \rightarrow \text{OH} + \text{CN}$                | $1.08\text{E-}10 * \text{EXP}(105./\text{temp}) * (1. - (0.68/2. + 0.15 * \text{EXP}(200./\text{temp})))$                                           | Strekowski et al. (2010)*                |
| G4161  | TrGN   | $\text{HCN} + \text{O}(^3\text{P}) \rightarrow \text{H} + \text{NCO}$                | $1.0\text{E-}11 * \text{EXP}(-4000./\text{temp})$                                                                                                   | Burkholder et al. (2015)*                |
| G4162  | TrGN   | $\text{CN} + \text{O}_2 \rightarrow \text{NCO} + \text{O}(^3\text{P})$               | $1.2\text{E-}11 * \text{EXP}(210./\text{temp}) * 0.75$                                                                                              | Baulch et al. (2005)                     |
| G4163  | TrGN   | $\text{CN} + \text{O}_2 \rightarrow \text{CO} + \text{NO}$                           | $1.2\text{E-}11 * \text{EXP}(210./\text{temp}) * 0.25$                                                                                              | Baulch et al. (2005)                     |
| G4164  | TrGN   | $\text{NCO} + \text{O}_2 \rightarrow \text{CO}_2 + \text{NO}$                        | 7.E-15                                                                                                                                              | Becker et al. (2000)*                    |
| G9200  | StTrGS | $\text{SO}_2 + \text{OH} \rightarrow \text{H}_2\text{SO}_4 + \text{HO}_2$            | $\text{k\_3rd}(\text{temp}, \text{cair}, 3.3\text{E-}31, 4.3, 1.6\text{E-}12, 0., 0.6)$                                                             | Burkholder et al. (2015)                 |
| G9403  | TrGS   | $\text{CH}_3\text{SO}_2 \rightarrow \text{SO}_2 + \text{CH}_3$                       | $1.8\text{E}13 * \text{EXP}(-8661./\text{temp})$                                                                                                    | Barone et al. (1995)                     |
| G9404  | TrGS   | $\text{CH}_3\text{SO}_2 + \text{O}_3 \rightarrow \text{CH}_3\text{SO}_3$             | 3.E-13                                                                                                                                              | Barone et al. (1995)                     |
| G9405  | TrGS   | $\text{CH}_3\text{SO}_3 + \text{HO}_2 \rightarrow \text{CH}_3\text{SO}_3\text{H}$    | 5.E-11                                                                                                                                              | Barone et al. (1995)                     |
| G9408  | StTrGS | $\text{CH}_2\text{OO} + \text{SO}_2 \rightarrow \text{H}_2\text{SO}_4 + \text{HCHO}$ | k_CH200_S02                                                                                                                                         | Welz et al. (2012), Stone et al. (2014)* |

## General notes

### Three-body reactions

Rate coefficients for three-body reactions are defined via the function `k_3rd`( $T, M, k_0^{300}, n, k_{\text{inf}}^{300}, m, f_c$ ). In the code, the temperature  $T$  is called `temp` and the concentration of “air molecules”  $M$  is called `cair`. Using the auxiliary variables  $k_0(T)$ ,  $k_{\text{inf}}(T)$ , and  $k_{\text{ratio}}$ , `k_3rd` is defined as:

$$k_0(T) = k_0^{300} \times \left(\frac{300\text{K}}{T}\right)^n \quad (1)$$

$$k_{\text{inf}}(T) = k_{\text{inf}}^{300} \times \left(\frac{300\text{K}}{T}\right)^m \quad (2)$$

$$k_{\text{ratio}} = \frac{k_0(T)M}{k_{\text{inf}}(T)} \quad (3)$$

$$\text{k\_3rd} = \frac{k_0(T)M}{1 + k_{\text{ratio}}} \times f_c^{\left(\frac{1}{1 + (\log_{10}(k_{\text{ratio}}))^2}\right)} \quad (4)$$

A similar function, called `k_3rd_iupac` here, is used by Wallington et al. (2018) for three-body reactions. It has the same function parameters as `k_3rd` and it is defined as:

$$k_0(T) = k_0^{300} \times \left(\frac{300\text{K}}{T}\right)^n \quad (5)$$

$$k_{\text{inf}}(T) = k_{\text{inf}}^{300} \times \left(\frac{300\text{K}}{T}\right)^m \quad (6)$$

$$k_{\text{ratio}} = \frac{k_0(T)M}{k_{\text{inf}}(T)} \quad (7)$$

$$N = 0.75 - 1.27 \times \log_{10}(f_c) \quad (8)$$

$$\text{k\_3rd\_iupac} = \frac{k_0(T)M}{1 + k_{\text{ratio}}} \times f_c^{\left(\frac{1}{1 + (\log_{10}(k_{\text{ratio}})/N)^2}\right)} \quad (9)$$

## Structure-Activity Relationships (SAR)

Some unmeasured rate coefficients are estimated with structure-activity relationships, using the following parameters and substituent factors:

| $k$ for H-abstraction by OH in $\text{cm}^{-3}\text{s}^{-1}$ |                                                                     |
|--------------------------------------------------------------|---------------------------------------------------------------------|
| <code>k_p</code>                                             | $4.49 \times 10^{-18} \times (T/\text{K})^2 \exp(-320 \text{ K}/T)$ |
| <code>k_s</code>                                             | $4.50 \times 10^{-18} \times (T/\text{K})^2 \exp(253 \text{ K}/T)$  |
| <code>k_t</code>                                             | $2.12 \times 10^{-18} \times (T/\text{K})^2 \exp(696 \text{ K}/T)$  |
| <code>k_ROHRO</code>                                         | $2.1 \times 10^{-18} \times (T/\text{K})^2 \exp(-85 \text{ K}/T)$   |
| <code>k_CO2H</code>                                          | $0.7 \times k_{\text{CH}_3\text{CO}_2\text{H}+\text{OH}}$           |
| <code>k_ROOHRO</code>                                        | $0.6 \times k_{\text{CH}_3\text{OOH}+\text{OH}}$                    |
| <code>f_alk</code>                                           | 1.23                                                                |
| <code>f_sOH</code>                                           | 3.44                                                                |
| <code>f_tOH</code>                                           | 2.68                                                                |
| <code>f_sOOH</code>                                          | 8.                                                                  |
| <code>f_tOOH</code>                                          | 8.                                                                  |
| <code>f_ONO2</code>                                          | 0.04                                                                |
| <code>f_CH2ON02</code>                                       | 0.20                                                                |
| <code>f_cpan</code>                                          | 0.25                                                                |
| <code>f_allyl</code>                                         | 3.6                                                                 |
| <code>f_CHO</code>                                           | 0.55                                                                |
| <code>f_CO2H</code>                                          | 1.67                                                                |
| <code>f_CO</code>                                            | 0.73                                                                |
| <code>f_O</code>                                             | 8.15                                                                |
| <code>f_pCH2OH</code>                                        | 1.29                                                                |
| <code>f_tCH2OH</code>                                        | 0.53                                                                |

| $k$ for OH-addition to double bonds in $\text{cm}^{-3}\text{s}^{-1}$ |                                                                                                                    |
|----------------------------------------------------------------------|--------------------------------------------------------------------------------------------------------------------|
| <code>k_adp</code>                                                   | $4.5 \times 10^{-12} \times (T/300 \text{ K})^{-0.85}$                                                             |
| <code>k_ads</code>                                                   | $1/4 \times (1.1 \times 10^{-11} \times \exp(485 \text{ K}/T) + 1.0 \times 10^{-11} \times \exp(553 \text{ K}/T))$ |
| <code>k_adt</code>                                                   | $1.922 \times 10^{-11} \times \exp(450 \text{ K}/T) - k_{\text{ads}}$                                              |
| <code>k_adsecprim</code>                                             | $3.0 \times 10^{-11}$                                                                                              |
| <code>k_adtertprim</code>                                            | $5.7 \times 10^{-11}$                                                                                              |
| <code>a_PAN</code>                                                   | 0.56                                                                                                               |
| <code>a_CHO</code>                                                   | 0.31                                                                                                               |
| <code>a_COCH3</code>                                                 | 0.76                                                                                                               |
| <code>a_CH2OH</code>                                                 | 1.7                                                                                                                |
| <code>a_CH2OOH</code>                                                | 1.7                                                                                                                |
| <code>a_COH</code>                                                   | 2.2                                                                                                                |
| <code>a_COOH</code>                                                  | 2.2                                                                                                                |
| <code>a_CO2H</code>                                                  | 0.25                                                                                                               |
| <code>a_CH2ON02</code>                                               | 0.64                                                                                                               |

## RO<sub>2</sub> self and cross reactions

The self and cross reactions of organic peroxy radicals are treated according to the permutation reaction formalism as implemented in the MCM (Rickard and Pascoe, 2009), as described by Jenkin et al. (1997). Every organic peroxy radical reacts in a pseudo-first-order reaction with a rate constant that is expressed as  $k^{\text{1st}} = 2 \times \sqrt{k_{\text{self}} \times \text{k\_CH302}} \times [\text{RO}_2]$  where  $k_{\text{self}}$  = second-order rate coefficient of the self reaction of the organic peroxy radical,  $\text{k\_CH302}$  = second-order rate coefficient of the self reaction of  $\text{CH}_3\text{O}_2$ , and  $[\text{RO}_2]$  = sum of the concentrations of all organic peroxy radicals.

## Specific notes

G2110: The rate coefficient is:  $k_{\text{H02\_H02}} = (3.0\text{E-}13 * \text{EXP}(460./\text{temp}) + 2.1\text{E-}33 * \text{EXP}(920./\text{temp}) * c_{\text{air}}) * (1. + 1.4\text{E-}21 * \text{EXP}(2200./\text{temp}) * C(\text{ind\_H2O}))$ .

G2117: Converted to  $K_c [\text{molec-1 cm}^3] = K_p * R * T / N_A$ , where  $R$  is 82.05736 [cm<sup>3</sup>atmK<sup>1</sup>mol<sup>1</sup>].

G2118: Assuming fast equilibrium.

G3109: The rate coefficient is:  $k_{\text{N03\_N02}} = k_{\text{3rd}}(\text{temp}, c_{\text{air}}, 2.4\text{E-}30, 3.0, 1.6\text{E-}12, -0.1, 0.6)$ .

G3110: The rate coefficient is defined as backward reaction divided by equilibrium constant.

G3203: The rate coefficient is:  $k_{\text{N02\_H02}} = k_{\text{3rd}}(\text{temp}, c_{\text{air}}, 1.9\text{E-}31, 3.4, 4.0\text{E-}12, 0.3, 0.6)$ .

G3206: The rate coefficient is:  $k_{\text{HN03\_OH}} = 1.32\text{E-}14 * \text{EXP}(527/\text{temp}) + 1 / (1 / (7.39\text{E-}32 * \text{EXP}(453/\text{temp}) * c_{\text{air}}) + 1 / (9.73\text{E-}17 * \text{EXP}(1910/\text{temp})))$

G3207: The rate coefficient is defined as backward reaction divided by equilibrium constant.

G4104b: Methyl nitrate yield according to Banic et al. (2003) but reduced by a factor of 10 according to the upper limit derived from measurements by Munger et al. (1999).

G4109: Same temperature dependence as for  $\text{CH}_3\text{CHO} + \text{NO}_3$  assumed.

G4115: The rate coefficient is defined as backward reaction divided by equilibrium constant.

G4116: Same value as for PAN + OH.

G4126: Same as for G4104 but scaled to match the recommended value at 298K.

G4127: Same as for  $\text{CH}_3\text{O}_2 + \text{NO}_3$  in G4105.

G4130a: SAR for H-abstraction by OH.

G4130b: SAR for H-abstraction by OH.

G4132: SAR for H-abstraction by OH.

G4133: Lower limit of the rate constant. Products uncertain but  $\text{CH}_3\text{OH}$  can be excluded because of a likely high energy barrier (L. Vereecken, pers. comm.).  $\text{CH}_2\text{OO}$  production cannot be excluded.

G4134: Estimate based on the decomposition lifetime of 3 s (Olzmann et al., 1997) and a 20 kcal/mol energy barrier (Vereecken and Francisco, 2012).

G4135: Rate constant for  $\text{CH}_2\text{OO} + \text{NO}_2$  (G4138) multiplied by the factor from Ouyang et al. (2013).

G4136: Average of two measurements.

G4137: Upper limit.

G4138: Average of 7.E-12 and 1.5E-12.

G4141:  $\text{HOOCCH}_2\text{OCHO}$  forms and then decomposes to formic anhydride (Gruzdev et al., 1993) which hydrolyses in the humid atmosphere (Conn et al., 1942).

G4142: High-pressure limit.

G4143: Generic estimate for reaction with alcohols.

G4144: Generic estimate for reaction with  $\text{RO}_2$ .

G4148: Same value as for  $\text{NO}_2 + \text{CH}_3\text{O}_2$ .

G4149: Barnes et al. (1985) estimated a decomposition rate equal to that of  $\text{CH}_3\text{O}_2\text{NO}_2$ .

G4150: Value for  $\text{CH}_3\text{O}_2\text{NO}_2 + \text{OH}$ , H-abstraction enhanced by the HO-group by  $f_{\text{sOH}}$ .

G4154: Products assumed to be  $\text{CH}_3\text{O}_2 + \text{O}_2$  (could also be  $\text{HCHO} + \text{O}_2 + \text{OH}$ ).

G4160b: Half of the H-yield is attributed to fast secondary chemistry.

G4160c: The NH + CO channel is also significant but neglected here.

G4161: No studies below 450 K and only the major channel is considered.

G4164: Upper limit. Dominant pathway under atmospheric conditions.

G9408: Average of 3.9E-11 and 3.42E-11.



Table 2: Photolysis reactions

| #            | labels    | reaction                                                                                                                                                          | rate coefficient | reference             |
|--------------|-----------|-------------------------------------------------------------------------------------------------------------------------------------------------------------------|------------------|-----------------------|
| J (gas)      |           |                                                                                                                                                                   |                  |                       |
| J1000a       | UpStTrGJ  | $\text{O}_2 + h\nu \rightarrow \text{O}(^3\text{P}) + \text{O}(^3\text{P})$                                                                                       | jx(ip_02)        | Sander et al. (2014)  |
| J1001a       | UpStTrGJ  | $\text{O}_3 + h\nu \rightarrow \text{O}(^1\text{D}) + \text{O}_2$                                                                                                 | jx(ip_01D)       | Sander et al. (2014)  |
| J1001b       | UpStTrGJ  | $\text{O}_3 + h\nu \rightarrow \text{O}(^3\text{P}) + \text{O}_2$                                                                                                 | jx(ip_03P)       | Sander et al. (2014)  |
| J2101        | UpStTrGJ  | $\text{H}_2\text{O}_2 + h\nu \rightarrow 2 \text{OH}$                                                                                                             | jx(ip_H2O2)      | Sander et al. (2014)  |
| J3101        | UpStTrGJN | $\text{NO}_2 + h\nu \rightarrow \text{NO} + \text{O}(^3\text{P})$                                                                                                 | jx(ip_N02)       | Sander et al. (2014)  |
| J3103a       | UpStTrGJN | $\text{NO}_3 + h\nu \rightarrow \text{NO}_2 + \text{O}(^3\text{P})$                                                                                               | jx(ip_N020)      | Sander et al. (2014)  |
| J3103b       | UpStTrGJN | $\text{NO}_3 + h\nu \rightarrow \text{NO} + \text{O}_2$                                                                                                           | jx(ip_N002)      | Sander et al. (2014)  |
| J3104        | StTrGJN   | $\text{N}_2\text{O}_5 + h\nu \rightarrow \text{NO}_2 + \text{NO}_3$                                                                                               | jx(ip_N205)      | Sander et al. (2014)  |
| J3200        | TrGJN     | $\text{HONO} + h\nu \rightarrow \text{NO} + \text{OH}$                                                                                                            | jx(ip_HONO)      | Sander et al. (2014)  |
| J3201        | StTrGJN   | $\text{HNO}_3 + h\nu \rightarrow \text{NO}_2 + \text{OH}$                                                                                                         | jx(ip_HN03)      | Sander et al. (2014)  |
| J3202        | StTrGJN   | $\text{HNO}_4 + h\nu \rightarrow .667 \text{NO}_2 + .667 \text{HO}_2 + .333 \text{NO}_3 + .333 \text{OH}$                                                         | jx(ip_HN04)      | Sander et al. (2014)  |
| J41000       | StTrGJ    | $\text{CH}_3\text{OOH} + h\nu \rightarrow \text{CH}_3\text{O} + \text{OH}$                                                                                        | jx(ip_CH300H)    | Sander et al. (2014)  |
| J41001a      | StTrGJ    | $\text{HCHO} + h\nu \rightarrow \text{H}_2 + \text{CO}$                                                                                                           | jx(ip_COH2)      | Sander et al. (2014)  |
| J41001b      | StTrGJ    | $\text{HCHO} + h\nu \rightarrow \text{H} + \text{CO} + \text{HO}_2$                                                                                               | jx(ip_CHOH)      | Sander et al. (2014)  |
| J41004       | StTrGJN   | $\text{CH}_3\text{ONO} + h\nu \rightarrow \text{CH}_3\text{O} + \text{NO}$                                                                                        | jx(ip_CH30N0)    | Sander et al. (2014)  |
| J41005       | StTrGJN   | $\text{CH}_3\text{ONO}_2 + h\nu \rightarrow \text{CH}_3\text{O} + \text{NO}_2$                                                                                    | jx(ip_CH3N03)    | Sander et al. (2014)  |
| J41006       | StTrGJN   | $\text{CH}_3\text{O}_2\text{NO}_2 + h\nu \rightarrow .667 \text{NO}_2 + .667 \text{CH}_3\text{O}_2 + .333 \text{NO}_3 + .333 \text{CH}_3\text{O}$                 | jx(ip_CH302N02)  | Sander et al. (2014)* |
| J41007       | StTrGJ    | $\text{HOCH}_2\text{OOH} + h\nu \rightarrow \text{HCOOH} + \text{OH} + \text{HO}_2$                                                                               | jx(ip_CH300H)    | Sander et al. (2014)  |
| J41008       | StTrGJ    | $\text{CH}_3\text{O}_2 + h\nu \rightarrow \text{HCHO} + \text{OH}$                                                                                                | jx(ip_CH302)     | Sander et al. (2014)  |
| J41009       | StTrGJ    | $\text{HCOOH} + h\nu \rightarrow \text{CO} + \text{HO}_2 + \text{OH}$                                                                                             | jx(ip_HCOOH)     | Sander et al. (2014)  |
| J41010       | StTrGJN   | $\text{HOCH}_2\text{O}_2\text{NO}_2 + h\nu \rightarrow .667 \text{NO}_2 + .667 \text{HOCH}_2\text{O}_2 + .333 \text{NO}_3 + .333 \text{HCOOH} + .333 \text{HO}_2$ | jx(ip_CH302N02)  | Sander et al. (2014)  |
| PH (aqueous) |           |                                                                                                                                                                   |                  |                       |

## General notes

*j*-values are calculated with an external module (e.g., JVAL) and then supplied to the MECCA chemistry.

Values that originate from the Master Chemical Mechanism (MCM) by Rickard and Pascoe (2009) are translated according in the following way:

j(11)  $\rightarrow$  jx(ip\_COH2)

j(12)  $\rightarrow$  jx(ip\_CHOH)

j(15)  $\rightarrow$  jx(ip\_HOCH2CHO)

j(18)  $\rightarrow$  jx(ip\_MACR)

j(22)  $\rightarrow$  jx(ip\_ACETOL)

j(23)+j(24)  $\rightarrow$  jx(ip\_MVK)

j(31)+j(32)+j(33)  $\rightarrow$  jx(ip\_GLYOX)

j(34)  $\rightarrow$  jx(ip\_MGLYOX)

j(41)  $\rightarrow$  jx(ip\_CH300H)

j(53)  $\rightarrow$  j(isopropyl nitrate)

j(54)  $\rightarrow$  j(isopropyl nitrate)

j(55)  $\rightarrow$  j(isopropyl nitrate)

j(56)+j(57)  $\rightarrow$  jx(ip\_NOA)

## Specific notes

J41006: product distribution as for HNO4

Table 3: Reversible (Henry’s law) equilibria and irreversible (“heterogenous”) uptake

| # | labels | reaction | rate coefficient | reference |
|---|--------|----------|------------------|-----------|
|---|--------|----------|------------------|-----------|

## General notes

The forward (`k_exf`) and backward (`k_exb`) rate coefficients are calculated in subroutine `mecca_aero_calc_k_ex` in the file `messy_mecca_aero.f90` using accommodation coefficients and Henry’s law constants from chemprop (see `chemprop.pdf`).

For uptake of X ( $X = \text{N}_2\text{O}_5$ ,  $\text{ClNO}_3$ , or  $\text{BrNO}_3$ ) and

subsequent reaction with  $\text{H}_2\text{O}$ ,  $\text{Cl}^-$ , and  $\text{Br}^-$  in H3201, H6300, H6301, H6302, H7300, H7301, H7302, H7601, and H7602, we define:

$$k_{\text{exf}}(\text{X}) = \frac{k_{\text{mt}}(\text{X}) \times \text{LWC}}{[\text{H}_2\text{O}] + 5 \times 10^2 [\text{Cl}^-] + 3 \times 10^5 [\text{Br}^-]}$$

Here,  $k_{\text{mt}}$  = mass transfer coefficient, and LWC = liquid water content of the aerosol. The total uptake rate of X is only determined by  $k_{\text{mt}}$ . The factors only affect

the branching between hydrolysis and the halide reactions. The factor  $5 \times 10^2$  was chosen such that the chloride reaction dominates over hydrolysis at about  $[\text{Cl}^-] > 0.1 \text{ M}$  (see Fig. 3 in Behnke et al. (1997)), i.e. when the ratio  $[\text{H}_2\text{O}]/[\text{Cl}^-]$  is less than  $5 \times 10^2$ . The ratio  $5 \times 10^2 / 3 \times 10^5$  was chosen such that the reactions with chloride and bromide are roughly equal for sea water composition (Behnke et al., 1994). These ratios were measured for uptake of  $\text{N}_2\text{O}_5$ . Here, they are also used for  $\text{ClNO}_3$  and  $\text{BrNO}_3$ .

Table 4: Heterogeneous reactions

| # | labels | reaction | rate coefficient | reference |
|---|--------|----------|------------------|-----------|
|---|--------|----------|------------------|-----------|

## General notes

Heterogeneous reaction rates are calculated with an external module (e.g., MECCA\_KHET) and then supplied to the MECCA chemistry (see [www.messy-interface.org](http://www.messy-interface.org) for details)

Table 5: Acid-base and other equilibria

| # | labels | reaction | $K_0[M^{m-n}]$ | $-\Delta H/R[K]$ | reference |
|---|--------|----------|----------------|------------------|-----------|
|---|--------|----------|----------------|------------------|-----------|

**Specific notes**

Table 6: Aqueous phase reactions

| # | labels | reaction | $k_0$ [ $M^{1-n}s^{-1}$ ] | $-E_a/R[K]$ | reference |
|---|--------|----------|---------------------------|-------------|-----------|
|---|--------|----------|---------------------------|-------------|-----------|

**Specific notes**

## References

- Albaladejo, J., Jiménez, E., Notario, A., Cabañas, B., and Martínez, E.:  $\text{CH}_3\text{O}$  yield in the  $\text{CH}_3 + \text{O}_3$  reaction using the LP/LIF technique at room temperature, *J. Phys. Chem. A*, 106, 2512–2519, doi:10.1021/jp012249o, 2002.
- Atkinson, R.: Kinetics of the gas-phase reactions of OH radicals with alkanes and cycloalkanes, *Atmos. Chem. Phys.*, 3, 2233–2307, doi:10.5194/ACP-3-2233-2003, 2003.
- Atkinson, R., Baulch, D. L., Cox, R. A., Crowley, J. N., Hampson, R. F., Hynes, R. G., Jenkin, M. E., Rossi, M. J., Troe, J., and IUPAC Subcommittee: Evaluated kinetic and photochemical data for atmospheric chemistry: Volume II – gas phase reactions of organic species, *Atmos. Chem. Phys.*, 6, 3625–4055, doi:10.5194/ACP-6-3625-2006, 2006.
- Banic, C. M., Beauchamp, S. T., Tordon, R. J., Schroeder, W. H., Steffen, A., Anlauf, K. A., and Wong, H. K. T.: Vertical distribution of gaseous elemental mercury in Canada, *J. Geophys. Res.*, 108D, 4264, doi:10.1029/2002JD002116, 2003.
- Barnes, I., Becker, K. H., Fink, E. H., Reimer, A., Zabel, F., and Niki, H.: FTIR spectroscopic study of the gas-phase reaction of  $\text{HO}_2$  with  $\text{H}_2\text{CO}$ , *Chem. Phys. Lett.*, 115, 1–8, doi:10.1016/0009-2614(85)80091-9, 1985.
- Barone, S. B., Turnipseed, A. A., and Ravishankara, A. R.: Role of adducts in the atmospheric oxidation of dimethyl sulfide, *Faraday Discuss.*, 100, 39–54, doi:10.1039/FD9950000039, 1995.
- Baulch, D. L., Bowman, C. T., Cobos, C. J., Cox, R. A., Just, T., Kerr, J. A., Pilling, M. J., Stocker, D., Troe, J., Tsang, W., Walker, R. W., and Warnatz, J.: Evaluated kinetic data for combustion modeling: Supplement II, *J. Phys. Chem. Ref. Data*, 34, 757–1397, doi:10.1063/1.1748524, 2005.
- Becker, K. H., Kurtenbach, R., Schmidt, F., and Wiesen, P.: Kinetics of the NCO radical reacting with atoms and selected molecules, *Combust. Flame*, 120, 570–577, doi:10.1016/S0010-2180(99)00108-X, 2000.
- Behnke, W., Scheer, V., and Zetzsch, C.: Production of  $\text{BrNO}_2$ ,  $\text{Br}_2$  and  $\text{ClNO}_2$  from the reaction between sea spray aerosol and  $\text{N}_2\text{O}_5$ , *J. Aerosol Sci.*, 25, S277–S278, doi:10.1016/0021-8502(94)90369-7, 1994.
- Behnke, W., George, C., Scheer, V., and Zetzsch, C.: Production and decay of  $\text{ClNO}_2$  from the reaction of gaseous  $\text{N}_2\text{O}_5$  with NaCl solution: Bulk and aerosol experiments, *J. Geophys. Res.*, 102D, 3795–3804, doi:10.1029/96JD03057, 1997.
- Bossolasco, A., Faragó, E. P., Schoemaeker, C., and Fittschen, C.: Rate constant of the reaction between  $\text{CH}_3\text{O}_2$  and OH radicals, *Chem. Phys. Lett.*, 593, 7–13, doi:10.1016/j.cplett.2013.12.052, 2014.
- Buras, Z. J., Elsamra, R. M. I., and Green, W. H.: Direct determination of the simplest Criegee intermediate ( $\text{CH}_2\text{OO}$ ) self reaction rate, *J. Phys. Chem. Lett.*, 5, 2224–2228, doi:10.1021/jz5008406, 2014.
- Burkholder, J. B., Sander, S. P., Abbatt, J., Barker, J. R., Huie, R. E., Kolb, C. E., Kurylo, M. J., Orkin, V. L., Wilmouth, D. M., and Wine, P. H.: Chemical Kinetics and Photochemical Data for Use in Atmospheric Studies, Evaluation No. 18, JPL Publication 15-10, Jet Propulsion Laboratory, Pasadena, <http://jpldataeval.jpl.nasa.gov>, 2015.
- Butkovskaya, N., Kukui, A., and Le Bras, G.: Pressure and temperature dependence of methyl nitrate formation in the  $\text{CH}_3\text{O}_2 + \text{NO}$  reaction, *J. Phys. Chem. A*, 116, 5972–5980, doi:10.1021/jp210710d, 2012.
- Chai, J., Hu, H., Dibble, T. S., Tyndall, G. S., and Orlando, J. J.: Rate constants and kinetic isotope effects for methoxy radical reacting with  $\text{NO}_2$  and  $\text{O}_2$ , *J. Phys. Chem. A*, 118, 3552–3563, doi:10.1021/jp501205d, 2014.
- Chao, W., Hsieh, J.-T., Chang, C.-H., and Lin, J. J.-M.: Direct kinetic measurement of the reaction of the simplest Criegee intermediate with water vapor, *Science*, 347, 751–754, doi:10.1126/science.1261549, 2015.
- Conn, J. B., Kistiakowsky, G. B., Roberts, R. M., and Smith, E. A.: Heats of organic reactions. XIII. Heats of hydrolysis of some acid anhydrides, *Journal of the American Chemical Society*, 64, 1747–1752, doi:10.1021/ja01260a001, 1942.
- Dulitz, K., Amedro, D., Dillon, T. J., Pozzer, A., and Crowley, J. N.: Temperature (208–318 K) and pressure (18–696 Torr) dependent rate coefficients for the reaction between OH and  $\text{HNO}_3$ , *Atmos. Chem. Phys.*, 18, 2381–2394, doi:10.5194/acp-18-2381-2018, 2018.
- Flocke, F., Atlas, E., Madronich, S., Schauffler, S. M., Aikin, K., Margitan, J. J., and Bui, T. P.: Observations of methyl nitrate in the lower stratosphere during STRAT: implications for its gas phase production mechanisms, *Geophys. Res. Lett.*, 25, 1891–1894, doi:10.1029/98GL01417, 1998.
- Gruzdev, A. N., Elokhov, A. S., Makarov, O. V., and Mokhov, I. I.: Some recent results of Russian measurements of surface ozone in Antarctica. A mete-

- orological interpretation, *Tellus*, 45B, 99–105, doi:10.3402/TELLUSB.V45I2.15584, 1993.
- Jenkin, M., Saunders, S. M., and Pilling, M. J.: The tropospheric degradation of volatile organic compounds: A protocol for mechanism development, *Atmos. Environ.*, 31, 81–104, doi:10.1016/S1352-2310(96)00105-7, 1997.
- Kleinböhl, A., Toon, G. C., Sen, B., Blavier, J.-F. L., Weisenstein, D. K., Strekowski, R. S., Nicovich, J. M., Wine, P. H., and Wennberg, P. O.: On the stratospheric chemistry of hydrogen cyanide, *Geophys. Res. Lett.*, 33, doi:10.1029/2006GL026015, 2006.
- Kohlmann, J.-P. and Poppe, D.: The tropospheric gas-phase degradation of  $\text{NH}_3$  and its impact on the formation of  $\text{N}_2\text{O}$  and  $\text{NO}_x$ , *J. Atmos. Chem.*, 32, 397–415, doi:10.1023/A:1006162910279, 1999.
- Lewis, T. R., Blitz, M. A., Heard, D. E., and Seakins, P. W.: Direct evidence for a substantive reaction between the Criegee intermediate,  $\text{CH}_2\text{OO}$ , and the water vapour dimer, *Phys. Chem. Chem. Phys.*, 17, 4859–4863, doi:10.1039/C4CP04750H, 2015.
- McCabe, D. C., Gierczak, T., Talukdar, R. K., and Ravishankara, A. R.: Kinetics of the reaction  $\text{OH} + \text{CO}$  under atmospheric conditions, *Geophys. Res. Lett.*, 28, 3135–3138, doi:10.1029/2000GL012719, 2001.
- Munger, J. W., Jacob, D. J., Fan, S.-M., Colman, A. S., and Dibb, J. E.: Concentrations and snow-atmosphere fluxes of reactive nitrogen at Summit, Greenland, *J. Geophys. Res.*, 104D, 13 721–13 734, doi:10.1029/1999JD900192, 1999.
- Nielsen, O. J., Sidebottom, H. W., Donlon, M., and Treacy, J.: Rate constants for the gas-phase reactions of OH radicals and Cl atoms with *n*-alkyl nitrites at atmospheric pressure and 298 K, *Int. J. Chem. Kinet.*, 23, 1095–1109, doi:10.1002/kin.550231204, 1991.
- Ogryzlo, E. A., Paltenghi, R., and Bayes, K. D.: The rate of reaction of methyl radicals with ozone, *Int. J. Chem. Kinet.*, 13, 667–675, doi:10.1002/kin.550130707, 1981.
- Olzmann, M., Kraka, E., Cremer, D., Gutbrod, R., and Andersson, S.: Energetics, kinetics, and product distributions of the reactions of ozone with ethene and 2,3-dimethyl-2-butene, *J. Phys. Chem. A*, 101, 9421–9429, doi:10.1021/JP971663E, 1997.
- Ouyang, B., McLeod, M. W., Jones, R. L., and Bloss, W. J.:  $\text{NO}_3$  radical production from the reaction between the Criegee intermediate  $\text{CH}_2\text{OO}$  and  $\text{NO}_2$ , *Phys. Chem. Chem. Phys.*, 15, 17 070–17 075, doi:10.1039/c3cp53024h, 2013.
- Paulot, F., Wunch, D., Crounse, J. D., Toon, G. C., Millet, D. B., DeCarlo, P. F., Vigouroux, C., Deutscher, N. M., González Abad, G., Notholt, J., Warneke, T., Hannigan, J. W., Warneke, C., de Gouw, J. A., Dunlea, E. J., De Mazière, M., Griffith, D. W. T., Bernath, P., Jimenez, J. L., and Wennberg, P. O.: Importance of secondary sources in the atmospheric budgets of formic and acetic acids, *Atmos. Chem. Phys.*, 11, 1989–2013, doi:10.5194/acp-11-1989-2011, 2011.
- Rickard, A. and Pascoe, S.: The Master Chemical Mechanism (MCM), <http://mcm.leeds.ac.uk>, 2009.
- Sander, R., Jöckel, P., Kirner, O., Kunert, A. T., Landgraf, J., and Pozzer, A.: The photolysis module JVAL-14, compatible with the MESSy standard, and the JVal PreProcessor (JVPP), *Geosci. Model Dev.*, 7, 2653–2662, doi:10.5194/GMD-7-2653-2014, 2014.
- Scribano, Y., Goldman, N., Saykally, R. J., and Leforestier, C.: Water dimers in the atmosphere III: Equilibrium constant from a flexible potential, *J. Phys. Chem. A*, 110, 5411–5419, doi:10.1021/jp056759k, 2006.
- Sivakumaran, V., Hölscher, D., Dillon, T. J., and Crowley, J. N.: Reaction between OH and HCHO: temperature dependent rate coefficients (202–399 K) and product pathways (298 K), *Phys. Chem. Chem. Phys.*, 5, 4821–4827, doi:10.1039/B306859E, 2003.
- Stone, D., Blitz, M., Daubney, L., Howes, N. U. M., and Seakins, P.: Kinetics of  $\text{CH}_2\text{OO}$  reactions with  $\text{SO}_2$ ,  $\text{NO}_2$ ,  $\text{NO}$ ,  $\text{H}_2\text{O}$  and  $\text{CH}_3\text{CHO}$  as a function of pressure, *Phys. Chem. Chem. Phys.*, 16, 1139–1149, doi:10.1039/c3cp54391a, 2014.
- Strekowski, R. S., Nicovich, J. M., and Wine, P. H.: Kinetic and mechanistic study of the Reactions of  $\text{O}(^1\text{D}_2)$  with HCN and  $\text{CH}_3\text{CN}$ , *Chem. Phys. Chem.*, 11, 3942–3955, doi:10.1002/cphc.201000550, 2010.
- Taraborrelli, D.: Isoprene oxidation and its impacts on the atmospheric composition, Ph.D. thesis, Johannes Gutenberg-Universität, Mainz, Germany, <http://d-nb.info/1003538770/34>, 2010.
- Vereecken, L. and Francisco, J. S.: Theoretical studies of atmospheric reaction mechanisms in the troposphere, *Chem. Soc. Rev.*, 41, 6259–6293, doi:10.1039/c2cs35070j, 2012.
- Vereecken, L., Harder, H., and Novelli, A.: The reaction of Criegee intermediates with  $\text{NO}$ ,  $\text{RO}_2$ , and  $\text{SO}_2$ , and their fate in the atmosphere, *Phys. Chem. Chem. Phys.*, 14, 14 682–14 695, doi:10.1039/c2cp42300f, 2012.

- Vereecken, L., Harder, H., and Novelli, A.: The reactions of Criegee intermediates with alkenes, ozone, and carbonyl oxides, *Phys. Chem. Chem. Phys.*, 16, 4039–4049, doi:10.1039/c3cp54514h, 2014.
- Wallington, T. J., Ammann, M., Cox, R. A., Crowley, J. N., Herrmann, H., Jenkin, M. E., McNeill, V., Mellouki, A., Rossi, M. J., and Troe, J.: IUPAC Task group on atmospheric chemical kinetic data evaluation: Evaluated kinetic data, <http://iupac.pole-ether.fr>, 2018.
- Welz, O., Savee, J. D., Osborn, D. L., Vasu, S. S., Percival, C. J., Shallcross, D. E., and Taatjes, C. A.: Direct kinetic measurements of Criegee intermediate ( $\text{CH}_2\text{OO}$ ) formed by reaction of  $\text{CH}_2\text{I}$  with  $\text{O}_2$ , *Science*, 335, 204–207, doi:10.1126/science.1213229, 2012.
- Welz, O., Eskola, A. J., Sheps, L., Rotavera, B., Savee, J. D., Scheer, A. M., Osborn, D. L., Lowe, D., Booth, A. M., Xiao, P., Khan, M. A. H., Percival, C. J., Shallcross, D. E., and Taatjes, C. A.: Rate coefficients of C1 and C2 Criegee intermediate reactions with formic and acetic acid near the collision limit: Direct kinetics measurements and atmospheric implications, *Angew. Chem.*, 126, 4635–4638, doi:10.1002/ange.201400964, 2014.
- Zellner, R., Hartmann, D., Karthäuser, J., Rhäsa, D., and Weibring, G.: A laser photolysis/LIF study of the reactions of  $\text{O}(^3\text{P})$  atoms with  $\text{CH}_3$  and  $\text{CH}_3\text{O}_2$  radicals, *J. Chem. Soc. Faraday Trans. 2*, 84, 549–568, doi:10.1039/f29888400549, 1988.
